# Supplementary material for: The biphasic and age-dependent impact of klotho on hallmarks of aging and skeletal muscle function
Source: PubMed Central journal article supplement (PMC8118657; doi:10.7554/elife.61138), 2021-04-20

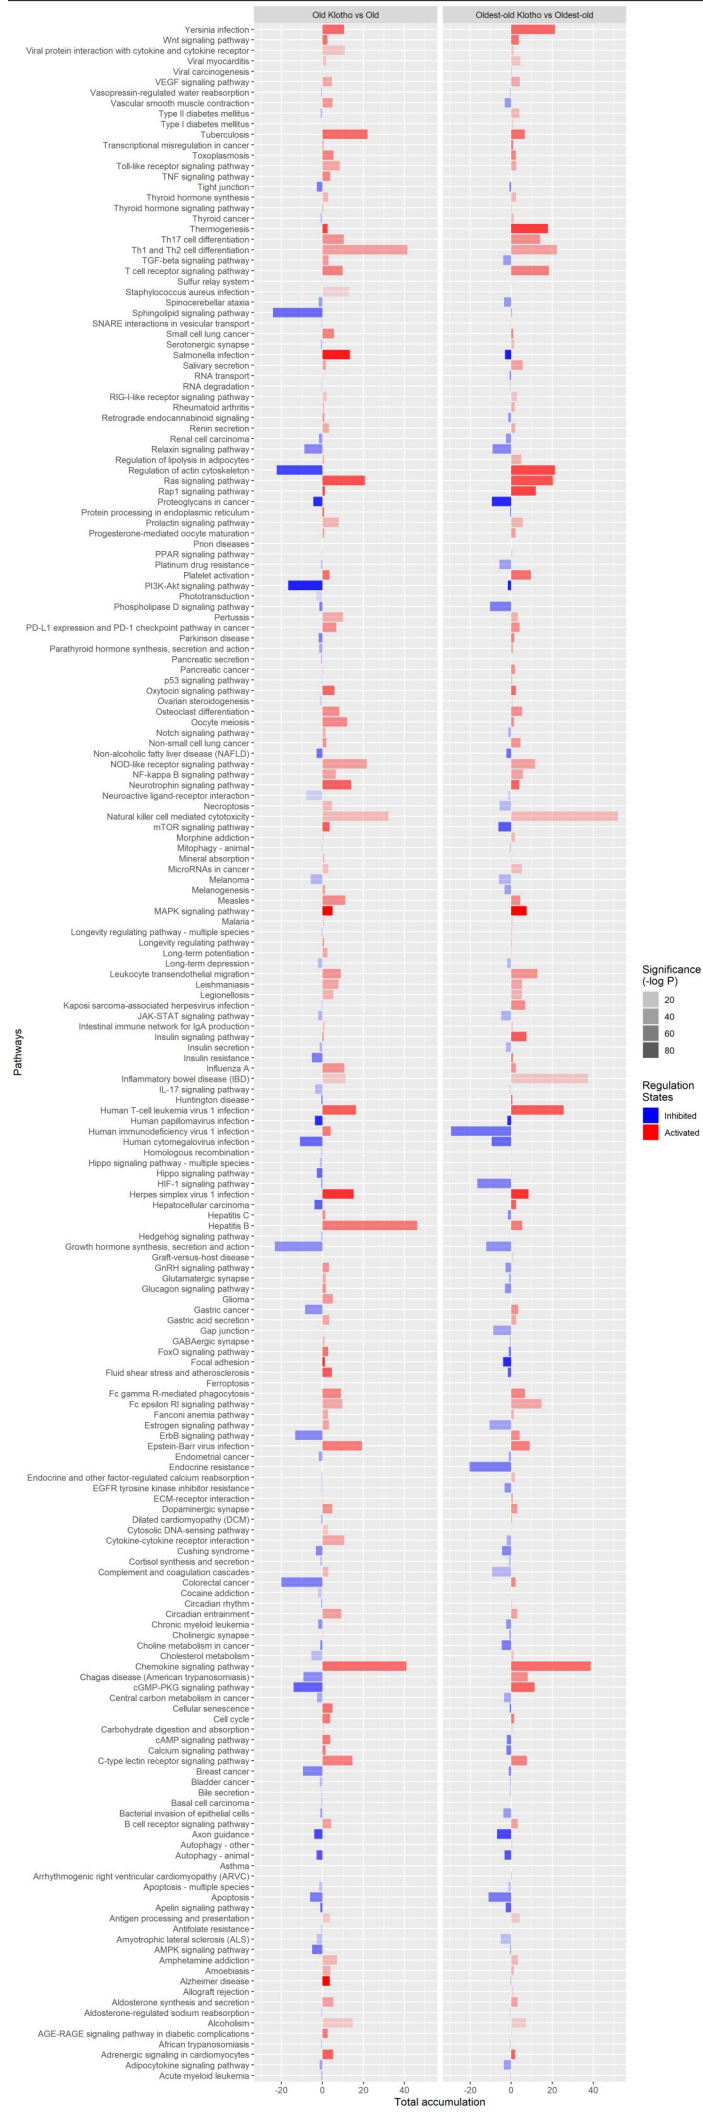

Supplement: elife-61138-supp1.pdf [file elife-61138-supp1.pdf]
