# Supplementary material for: The biphasic and age-dependent impact of klotho on hallmarks of aging and skeletal muscle function
Source: eLife. 2021 Apr 20;10:e61138. doi: 10.7554/eLife.61138 (PMC8118657; doi:10.7554/eLife.61138)
Supplement: Figure 1—source data 1. [file elife-61138-fig1-data1.xlsx]

## Sheet: Figure 1
Figure 1A - TA as % of Body Weight									Figure 1B. Mean Fiber CSA (um^2)									Figure 1D. Percent Type IIA and IIX Fibers									Figure 1E. Collagen Percent Area									Figure 1F. Intermuscular Adipose Tissue (AU/mm^2)									Figure 1G. Intramuscular Adipose Tissue (AU/mm^2)
Male				Female					Male				Female					Male				Female					Male				Female					Male				Female					Male				Female
3-6	10-14	21-24	27-29	3-6	10-14	21-24	27-29		3-6	10-14	21-24	27-29	3-6	10-14	21-24	27-29		3-6	10-14	21-24	27-29	3-6	10-14	21-24	27-29		3-6	10-14	21-24	27-29	3-6	10-14	21-24	27-29		3-6	10-14	21-24	27-29	3-6	10-14	21-24	27-29		3-6	10-14	21-24	27-29	3-6
0.179487	0.183183	0.152381	0.127273	0.1033	0.164463	0.1439	0.118		2179.78	2572.45	1692.83	2150.52	2112.86	1990.96	2516.35	1492.62		31.7724	39.3418	39.8221	29.1152	37.4693	43.6969	36.1569	28.3834		18.879	13.7251	18.7759	23.909	9.2693	7.48176	9.4609	22.751		21.4016	18.0642	18.0015	10.7473	8.76687	12.5406	14.5576	14.6076		100.284	100.509	97.0127	60.8224	19.4687
0.177994	0.160819	0.156334	0.125	0.0942	0.155556	0.1293	0.1408		2299.86	2459.62	2159.43	1758.24	2221.79	1974.76	2640.83	1530.93		54.2433	42.7251	26.577	32.0455	32.7032	35.9551	51.5794	28.0386		9.70402	26.6227	16.3691	21.6524	16.6332	8.06137	10.7349	22.8813		17.4544	13.1537	35.6745	13.6624	8.89066	48.2538	24.6415	8.50651		87.2358	82.3953	93.3315	83.0864	20.7305
0.183521	0.180556	0.154519	0.111782	0.1745	0.12628	0.1204	0.12		2474.71	1916.71	1819.05	2156.2	2437.65	2286.15	2256.16	1236.52		38.6506	58.7024	10.5137	15.6447	41.5284	22.2038	49.7643	23.5929		15.3885	21.3295	19.6146	21.0283	10.0985	7.61188	12.0624	21.0417		16.1309	6.42898	8.78648	10.9226	12.5002	10.2652	15.9018	8.87676		88.1966	33.5266	32.9387	40.6935	51.8726
0.175896	0.181347	0.152439	0.111111	0.1354	0.124183	0.12	0.1212		2705.07	2355.56	2796.31	2107.17	2193.49	2011.32	2301.65	1550.44		38.0612	43.6437	32.9564	18.1106	37.7911	32.0019	45.9153	36.3743		12.0287	17.3562	13.2784	20.7582	15.1337	7.15062	13.0408	32.9407		12.9387	10.2653	7.96518	13.7043	6.90102	16.8727		8.09899		74.6307	43.82	72.5952	67.7134	17.9205
0.174377	0.143478	0.158046	0.123894	0.1074	0.148515	0.1178	0.1134		3269.24		2348.27	1994.14		1883.27	2338.29	1775.8		32.8203		35.1091	29.6152		43.5977	46.659	27.8776				17.0336			6.98423	12.2139	34.4735
0.170819	0.118272	0.126096	0.122222	0.1577	0.112853	0.128	0.1477		2000.1		2272.59	1999.91		1905.51	2051.17	1611.71		26.4807		32.4786	30.6182		40.8349	45.2494	40.0763
0.175439	0.130667	0.131962	0.133987	0.1188		0.1525	0.1067				2007.21	1527.07				1499.84				45.7452	33.8521				30.8179
0.195035	0.177019	0.121839	0.133333	0.1637		0.1338	0.1242				2379.45	1959.05				1464.29				38.5965	23.7639				35.6106
0.163987	0.154971	0.130208	0.122186	0.1739		0.1289	0.131					2124.29									23.9541
0.151603		0.122807	0.153355	0.1525		0.1168	0.1484
0.145631		0.124197	0.145215	0.1342		0.1268	0.1203
0.196417		0.146982	0.14759	0.1531		0.1345	0.1237
0.168167			0.145015	0.1519		0.11	0.1278
0.178548			0.138973	0.1792		0.1057	0.1098
0.164127			0.155556	0.1841		0.1429	0.139
0.184191				0.1789		0.1673	0.1136
0.15068				0.1703		0.1327	0.1279
0.168889				0.1689		0.1285	0.1336
0.180061						0.1313	0.1013
0.172414						0.162362	0.0947
0.190647						0.152727	0.1273
						0.156028	0.1268
						0.126404	0.1058
						0.132716	0.1222
							0.0966
							0.0917808
							0.10209
							0.0912226
							0.0966942
							0.0889881
[truncated: 3 more columns]

## Sheet: Figure 1-figure supplement 1
Figure 1-figure supplement 1A. Physiological TA CSA (um^2)									Figure 1-figure supplement 1B. Fiber Numbers									Figure 1-figure supplement 1D. Percent Type IIB Fibers									Figure 1-figure supplement 1E. Type IIB Fiber Area (um^2)									Figure 1-figure supplement 1F. Type IIA Fiber Area (um^2)									Figure 1-figure supplement 1G. Type IIA Fiber Area
Male				Female					Male				Female					Male				Female					Male				Female					Male				Female					Male				Female
3-6	10-14	21-24	27-29	3-6	10-14	21-24	27-29		3-6	10-14	21-24	27-29	3-6	10-14	21-24	27-29		3-6	10-14	21-24	27-29	3-6	10-14	21-24	27-29		3-6	10-14	21-24	27-29	3-6	10-14	21-24	27-29		3-6	10-14	21-24	27-29	3-6	10-14	21-24	27-29		3-6	10-14	21-24	27-29	3-6
4.07595	4.1944	4.27	3.46	3.11399	2.42588	2.1	2.64		1986	1975	1911	2023	2039	1412	2243	1899		67.2205	60.4051	57.4568	69.7973	62.0893	55.7365	63.6647	71.4587		2566.82	3186.02	2088.69	2514.27	2618.17	2601.01	3024.41	1599.28		1094.57	1135.41	732.154	1019.14	913.122	856.816	1229.43	1161.68		1504.81	1793.81	1329.88	1395.7	1405.65
3.72682	3.94877	3.78	3.09	3.50333	2.76371	2.51	2.52		2557	2055	1934	1320	2645	2670	2216	1555		45.483	56.7397	72.8025	67.0455	60.2647	63.8951	48.3303	71.6399		3260.01	3193.54	2442.67	2046.64	2741.18	2414.64	3354.19	1719.99		994.252	1142.85	1341.69	857.9	1403.15	941.861	1411.81	723.721		1624.61	1636.65	1428.32	1272.59	1455.19
3.83255	4.79068	3.73	2.83	2.5459	2.93604	2.26	2.04		2075	971	2083	1272	1989	1207	2546	1759		61.253	40.0618	83.4373	83.7264	51.5334	77.7133	49.8429	75.7817		3056.88	2498.88	1935.09	2305.67	3286.24	2561.76	2944.26	1329.98		1179.92	1068.02	1217.39	1194.65	1347.18	826.913	1162.34	790.479		1655.62	1638.77	1129.14	1408.3	1607.42
3.34011	4.92819	3.92784	3.16	2.92052	3.26812	2.22	2.02		1537	1235	1857	1916	2834	2103	2644	2554		60.5725	54.8988	66.7744	81.0543	55.2929	67.903	53.8578	63.4691		3298.56	3078.68	3265.15	2254.96	2788.34	2365.8	2892.01	1778.18		1480.27	1033.53	1565.42	1048.55	1380.84	1035.18	1148.62	959.855		1871.86	1597.75	1910.23	1647.81	1493.36
3.45313			3.21779	2.60642	2.73228	2.6	2.88		2014		2797	2573		2257	2619	2059		67.0804		64.7837	69.8795		55.8706	53.3028	71.5881		3891.02		2720.66	2263.94		2431.09	3000.4	2031.34		1497.22		1075.81	880.237		907.457	1250.23	765.148		2131.67		1776.67	1474.51
3.82848			3.61426				2.6		3191		2808	2394		2204	1684	1048		72.6731		66.3105	69.1312		58.9837	54.3349	59.1603		2288.11		2649.81	2337.92		2383.43	2802.34	1821.77		1108.75		1036.69	804.183		977.086	724.983	714.334		1268.24		1666.28	1365.13
			3.20572				2.39				2221	3084				2372				53.7145	66.1479				69.14				2452.56	1723.12				1685.07				1142.97	873.888				879.686				1581.82	1201.79
			3.32076				2.66				2622	2609				1654				61.3654	75.7378				61.7896				2804.03	2178.47				1590.51				960.998	889.984				839.002				1817.95	1369.53
			3.38853				1.58728					1482									75.3711									2322.43									875.818									1649.67
			3.61975				1.89413
			3.56291				2.28629
			4.15986
[truncated: 3 more columns]

## Sheet: Figure 1-figure supplement 2
Figure 1-figure supplement 2
MUSK					NCAM1					RUNX1
3-6	12	21-24	27		3-6	12	21-24	27		3-6	12	21-24	27
249.036	314.458	359.455	434.833		72.5446	63.7137	89.5296	86.1331		34.3116	63.7137	26.7253	41.6773
232.467	302.942	305.896	655.642		138.902	127.396	90.2183	123.49		18.3456	59.184	29.6029	156.59
254.886	344.99	402.172	388.798		118.065	105.211	85.4894	91.0898		29.1578	58.0259	40.8862	62.2077
233.251	296.413	439.252	265.718		109.908	84.2358	112.024	99.3827		15.0234	17.198	56.9947	100.429
370.983	137.729	334.204			85.0718	61.5876	103.975			44.7285	17.8309	43.3228
317.496	150.12	443.758			113.775		82.0279			69.9244	31.5636	32.2733
144.458		208.891			165.366		119.677			84.1979		56.5746
181.544		309.969			125.15		175.441			38.0152		116.498
184.244					133.995					53.3046
165.02					105.763					6.69977
										39.7547
	Blue = Male
	Red = Female
