# Supplementary material for: The biphasic and age-dependent impact of klotho on hallmarks of aging and skeletal muscle function
Source: eLife. 2021 Apr 20;10:e61138. doi: 10.7554/eLife.61138 (PMC8118657; doi:10.7554/eLife.61138)
Supplement: Figure 2—source data 1. [file elife-61138-fig2-data1.xlsx]

## Sheet: Figure 2
Figure 2A - Hang Impulse (g*s)									Figure 2B - Maximum Specific Tetanic Force (mN/mm^2)									Figure 2C. Male Force-Frequency Curves (mN/mm^2)																											Figure 2C. Male Force-Frequency Curves (mN/mm^2)
Male				Female					Male				Female					Each columns represents one animal, NAs indicate failed stimulations																											Each columns represents one animal, NAs indicate failed stimulations
3-6	10-14	21-24	27-29	3-6	10-14	21-24	27-29		3-6	10-14	21-24	27-29	3-6	10-14	21-24	27-29		Frequency	3-6						10-14				21-24				27-29												Frequency	3-6
5689.57	1642.8	1456.67	752.1	733.333	4961	2516.67	2758.27		16.446	15.1179	12.2088	8.90027	12.4585	14.4354	14.5612	6.27695		10	4.97244	3.63857	4.26202	4.99884	5.86935	4.69549	4.85327	3.42715	4.52191	5.18847	4.26373	6.20486	5.83354	4.77696	4.47121	8.60391	6.42829	3.65746	5.76064	4.60933	3.46885	5.60581	2.34865	5.13554	6.80497		10	3.82398	3.8204	4.58788	3.89311
1153.2	2302.8	1726.67	171	12600	1485	1913.6	2159		14.1129	13.2845	12.7476	11.3711	12.1958	18.3402	15.8789	4.92409		30	8.7662	7.59866	8.01924	6.52937	13.4193	11.073	7.0539	4.99895	6.42655	7.77195	7.97177	10.5735	9.86366	10.3307	6.54003	8.03583	9.85932	6.9212	10.9528	10.3605	5.65323	9.95305	6.24106	10.455	7.49749		30	8.19129	6.50409	7.98449	6.75003
1127	3672	1073.33	210	12000	158.4	1179	1622.93		13.7927	11.9848	13.8822	9.85932	12.5009	15.2358	14.8915	9.92546		50	14.9137	12.592	12.3674	12.3749	15.6296	14.244	14.1801	11.3185	11.1486	14.7197	11.8372	12.7476	13.4243	12.0196	NA	10.2513	7.45883	7.97654	14.2536	11.911	4.48167	11.2882	5.49214	11.9362	2.57448		50	10.6938	10.6337	11.33	9.64518
1946.93	1235.2	558.333	432.933	546	3250	889.2	1525.1		13.0782	17.5377	12.0196	7.97654	13.8496	16.3571	15.2957	12.7743		80	16.3956	13.6998	13.5892	13.0782	16.8291	15.3813	15.1179	12.9362	11.9848	16.8936	12.2088	12.7395	13.8299	11.6721	NA	10.8972	9.50209	6.6571	14.6998	12.1905	3.67141	11.016	6.63708	12.4319	0.558369		80	12.1611	11.9653	12.5009	10.3409
4875.2	2097.67	800.133		5250.67	2317	2375.4	410.933		16.9153			14.6998			16.0933	11.6563		100	16.446	14.1129	13.7927	13.0306	16.9153	15.725	14.9993	13.1575	11.8116	17.5377	11.6	12.0936	13.8296	10.783	8.63149	10.4949	8.84259	4.41236	13.6997	12.1987	11.1991	9.40565	6.04763	12.218	0.54699		100	12.4585	12.1958	12.2397	10.0605
6313.07	1568	609.167		13200	1127.13	921.067	1475.83		15.725			12.1987				13.0407		120	16.0533	13.866	13.2534	12.5337	16.8159	15.6256	14.6069	13.2845	11.1568	17.461	10.9383	11.5385	13.8822	9.56976	8.37232	11.171	9.63875	3.43047	13.3866	11.9038	10.5994	7.87328	6.54075	11.6274	0.537334		120	12.3356	12.1316	11.9015	9.64766
4286.4		707.7		7088	751.333	365.8	1679.4					11.1991				8.31049		150	15.5317	12.9679	12.7994	11.8195	16.4509	15.6092	13.5651	12.9763	10.5363	16.7933	10.0121	10.9141	13.3908	8.61009	8.20988	11.1557	9.29983	3.59683	12.8102	11.341	10.0361	5.72303	6.19657	10.6672	NA		150	12.0295	11.8136	11.4337	9.25718
2732.8		1314.3		11858		1461.7	1029					11.2882				16.4109		180	14.6274	12.2179	12.6353	10.7691	15.6266	15.3569	12.6577	12.2375	9.51839	16.3127	9.01636	9.99102	12.7939	7.76811	8.24856	11.1463	7.58901	3.28179	12.4915	10.5886	9.45333	5.01949	6.46014	10.1342	NA		180	11.4587	11.4102	11.0718	8.59131
2781.9		1201.2		2668.57		1480.5	1425.93					6.63708				10.8676		200	14.1835	11.6838	12.296	9.70269	15.3392	15.1118	11.9075	11.6923	8.33258	15.8474	8.50385	9.38291	12.0941	7.37576	8.90027	11.3711	7.40522	2.92114	11.5261	10.429	9.19748	3.86228	6.34683	9.77712	NA		200	11.6058	11.1066	10.5687	8.27795
1006.13		968.6		2913.93		1602.3	1532.17					12.4319
555.2		1149.5		2307.83		956.8	795.6					7.49749
217.867		677.6		1449		1550.97	959
973.867		713.7		2407.5		567.467	1100.8
1811.27		512.4		1001		1372.33	251.333
		168		2289		2533.57	1387.2
		345.133		2710.67		2517.5	1367.7
		174.4		5339.17		2956.1	1661.6
		117		1902.83		2357.2	671.6
		126.667					854
		506.6					392
		160					182
		210.9					841
		713.7					1455
		1570.83					410.4
		1231.7					523.933
		952					902.367
		249.9					552
		912					1384.37
		639					196.8
		124.667					953.867
		481.392					898.333
		857.267					690.433
		1029.2					1157.33
		2282.5					1026.67
		3152.7
		2579.2
		1108.8
		743.4
		1284
		1468.07
		729.533
		487.333
		928.567
[truncated: 36 more columns]
