# Supplementary material for: The biphasic and age-dependent impact of klotho on hallmarks of aging and skeletal muscle function
Source: eLife. 2021 Apr 20;10:e61138. doi: 10.7554/eLife.61138 (PMC8118657; doi:10.7554/eLife.61138)
Supplement: Figure 3—source data 1. [file elife-61138-fig3-data1.xlsx]

## Sheet: Figure 3-figure supplement 4
Figure 3-Figure Supplement 4
C) Rats	Age (Months)	Spatial entropy per node		C) Humans	Decade	Age	Spatial entropy per node
	6	178.612			20s	22	222.465
	6	178.758			20s	23	205.58
	6	179.892			20s	25	210.941
	6	178.707			20s	25	220.698
	6	177.377			20s	26	222.402
	6	181.861			20s	26	222.033
	6	180.586			20s	27	215.638
	9	182.492			20s	28	204.987
	9	179.38			30s	31	191.529
	9	178.726			30s	31	217.356
	9	179.196			30s	31	205.812
	9	180.777			30s	33	222.724
	9	180.121			30s	35	222.901
	9	179.078			30s	37	211.738
	12	176.292			30s	37	219.182
	12	179.834			30s	38	215.429
	12	181.729			30s	38	200.049
	12	180.027			40s	42	215.528
	12	177.568			40s	42	196.905
	12	176.053			40s	45	192.377
	12	179.013			40s	45	210.942
	12	183.065			40s	47	215.925
	18	176.942			40s	47	220.974
	18	177.064			50s	51	202.744
	18	178.009			50s	52	220.783
	18	181.013			50s	52	201.577
	18	179.148			50s	52	199.211
	18	176.357			50s	52	221.487
	18	179.708			50s	54	216.345
	21	179.602			50s	57	211.769
	21	178.778			50s	58	211.062
	21	178.925			60s	60	215.191
	21	177.708			60s	62	213.135
	21	176.784			60s	63	221.315
	21	178.231			60s	63	220.425
	21	181.014			60s	67	214.584
	24	178.342			60s	67	212.277
	24	179.686			60s	67	219.784
	24	178.064			60s	69	219.433
	24	180.992			70s	70	219.647
	24	178.901			70s	70	217.305
	24	181.202			70s	72	218.07
	24	180.776			70s	72	216.906
	24	181.286			70s	72	202.694
	27	182.841			70s	72	222.791
	27	179.059			70s	72	211.376
	27	182.587			70s	73	211.917
	27	179.678			70s	76	220.878
	27	180.007			80s	80	220.901
	27	181.72			80s	81	221.172
	27	179.861			80s	81	219.069
	27	180.379			80s	81	211.468
					80s	83	203.441
