# Supplementary material for: The biphasic and age-dependent impact of klotho on hallmarks of aging and skeletal muscle function
Source: eLife. 2021 Apr 20;10:e61138. doi: 10.7554/eLife.61138 (PMC8118657; doi:10.7554/eLife.61138)
Supplement: Figure 4—source data 1. [file elife-61138-fig4-data1.xlsx]

## Sheet: Figure 4
Figure 4A - Circulating Klotho (ng/mL)											Figure 4B - Circulating FGF23 (ng/mL)											Figure 4D - Vector Copies per 100 ng DNA					Figure 4E - Circulating Klotho (ng/mL)					Figure 4F - Normalized Gene Count of Klotho in TA						Figure 4G - Seum Insulin (ng/mL)						Figure 4H - Serum Cholesterol (mg/dL)
Male					Female						Male					Female
3-6	10-14	21-24	27-29	Kl-/-	3-6	10-14	21-24	27-29	Kl-/-		3-6	10-14	21-24	27-29	Kl-/-	3-6	10-14	21-24	27-29	Kl-/-		GFP 1e10	KL 1e8	KL 3e9	KL 1e10		GFP 1e10	KL 1e8	KL 3e9	KL 1e10		3-6 GFP	21-24 GFP	21-24 Kl	27-29 GFP	27-29 Kl		3-6 GFP	21-24 GFP	21-24 Kl	27-29 GFP	27-29 Kl		3-6 GFP	21-24 GFP	21-24 Kl	27-29 GFP	27-29 Kl
3.44223	1.92443	1.72604	2.14576	0.583197	1.31301	1.83508	2.16297	1.30431	0.96418		-200.327	201.402	301.275	590.074	17371.6	18.8557	92.6649	347.414	2102.61	16590.8		221.821	2.7	469.084	2447.56		0.972286	0.529231	123.923	150.43		16.2692	10.0967	3.42624	0.847439	7.58592		1.626	1.079	0.313	1.124	1.694		65.952	138.972	122.543	133.496	76.905
3.01884	1.83702	1.89121	1.04933	0.974278	2.5204	2.18933	2.34521	0.941989	0.954044		-63.9917	-1.41115	310.589	196.333	16779.1	-92.9961	36.2364	167.415	2864.14	16737.6		679.873	2.578	400.107	2251.76		0.871785	0.367382	42.1171	271.598		20.1921	11.6986	7.76668	7.05927	3.98834		0.489	4.207	0.751	4.429	0.751		67.778	148.1	118.892	264.931	86.033
2.96179	1.84098	1.84644	2.10541	1.05117	2.93151	1.52386	2.27389	1.05805	1.1769		-83.3304	1.90835	44.9026	279.694	16850.6	18.4256	16.4675	208.53	11170.9	16727.8		1386.65	4.228	664.796	3558.33		8.70227	0.791313	59.2837	204.037		16.3588	0	6.80516	6.37633	1.85849		0.912	1.81	0.258	0.449	1.52		104.288	84.207	80.556	111.59	102.462
3.55297	1.253	2.98933	2.0308	1.47927	2.05973	1.515	1.78883	0.881624	0.495607		-37.9798	-53.9325	516.692	460.594	16726.5	5.61926	31.2578	66.9501	238.056	16809.7		1272.06	7.083	1145.62	3272.46		0.680545	2.74213	118.07	197.161		20.4892	12.3694	9.32085	3.00528	8.52042		0.108	1.75	0.779		0.807		89.684	133.496	111.59		91.509
1.98221	1.73587	2.44557	0.530495		0.547088	2.66022	0.603577	0.706738	0.695843							-13.8858	35.5151	79.4065	297.364			1599.67	4.332	218.226	2911.45		0.407897	0.740982	34.4551	193.485								1.03	0.419					74	91	73.254
2.30486		1.96916			0.874997	2.23939	0.512164	1.28787	0.923264							-31.4666	71.8449	133.454	233.599			595.392	12.698	986.22	6213.01		0.791313	1.62378	54.4615	285.795								0.993	2.77					80	85
2.30756		2.20131			0.94069	2.33776	1.11977	0.782251	0.418839							-25.5897	24.6329	227.678	399.814				26.212	967.502	8811.88		0.982332	2.65239	78.4308	346.587								0.717	2.45					67	77
1.96926		2.977			0.5868	3.72491	0.79381	1.23391	1.06324							-1.83841	81.1743	262.772	213.702				4.109	509.743	9553.79			0.720841	35.0898	138.147								0.621						76	66
1.02605		2.688			1.85085	3.40044	1.01417											237.337	3984.06				2.497	107.68	1103.3			0.41802	9.08047									1.56						68	88
0.809838		2.22443			1.2454														232.904																			0.645						89
1.41367		2.52271			1.1051																																	1.88						75
2.05108		1.42669			2.59474						Negative (undetectable) values set to 0 for analysis																																	87
		1.0032			2.01758																																							43
		1.47782																																										86
		1.69484
[truncated: 5 more columns]

## Sheet: Figure 4-figure supplement 1
Figure 4-figure supplement 1
Phospholipids (mg/dL)						NEFA (mEq/L)						Triglycerides (mg/dL)
3-6 GFP	21-24 GFP	21-24 Kl	27-29 GFP	27-29 Kl		3-6 GFP	21-24 GFP	21-24 Kl	27-29 GFP	27-29 Kl		3-6 GFP	21-24 GFP	21-24 Kl	27-29 GFP	27-29 Kl
149.232	170.712	174.617	127.753	395.271		0.402	0.638	0.483	0.725	0.645		30.729	43.077	50.486	62.834	36.903
188.286	127.753	177.546	121.895	125.8		0.507	0.582	0.739	0.718	0.606		35.668	54.19	45.547	67.773	29.494
108.226	232.222	96.51	200.979	129.705		0.58	0.399	0.456	0.636	0.873		78.887	36.903	18.381	40.608	31.964
100.415	216.6	153.138		118.966		0.477	0.567	0.564		0.58		43.077	82.591	52.956		56.66
		139.469						0.5						22.085
