# Supplementary material for: The biphasic and age-dependent impact of klotho on hallmarks of aging and skeletal muscle function
Source: eLife. 2021 Apr 20;10:e61138. doi: 10.7554/eLife.61138 (PMC8118657; doi:10.7554/eLife.61138)
Supplement: Figure 5—source data 1. [file elife-61138-fig5-data1.xlsx]

## Sheet: Figure 5
Figure 5B. Fiber Area with AAV-Treatment (um^2)			Figure 5C. Collagen IV Intensity (AU/um^2)			Figure 5E. Collagen Area Percentage			Figure 5F. FAPs:MuSCs			Figure 5H. Percentage of Mitochondria by Class															Figure 5I. Single-Twitch Specific Force (mN/mm^2)			Figure 5J. Maximum Tetanic Specific Force (mN/mm^2)			Figure 5K. Percent Initial Response
GFP	KL		Figure 5C. Collagen IV Intensity (AU/um^2(	KL		GFP	KL		GFP	KL		Mito. Class	GFP					KL									Figure 5G. Single-Twitch Specific Force (mN/mm^2)	KL		GFP	KL			Time	GFP										KL
1059.85	657.598		7778.44	5255.11		51.4972	9.2095		35.0283	2.76294		Normal	59.6552	55.3575	38.4436	41.4024	36.8872	67.1475	58.2045	52.1199	68.1916	65.4788	56.5614	76.3194	89.904		3.36064	4.076		8.61589	12.3333		Fatigue	0	100	100	100	100	100	100	100	100	100	100	100	100	100	100	100
1128.88	608.384		6744.68	6922.96		12.0382	22.4676		76.0647	4.07655		Aberrant	18.0357	20.0133	20.4176	27.0166	13.0131	20.2353	24.2058	33.5526	1.75439	17.071	1.44928	6.875	3.45202		4.81065	4.355		12.9366	11.8867			1	81.6281	83.6891	79.605	81.1869	85.6624	62.9017	79.4704	77.5429	83.0548	75.0619	79.3221	79.0342	77.669	81.1689	80.988
1379.56	1483.94		7594.51	6159.35		48.9026	34.5532		74.8131	2.8216		Empty	22.3091	24.6292	41.1387	31.581	50.0997	12.6172	17.5898	14.3275	30.0541	17.4501	41.9893	16.8056	6.64394		3.37176	4.946		8.16209	12.5553			2	70.5981	72.3463	68.8018	68.0825	77.6558	55.5018	68.0172	69.7925	70.1249	70.8849	72.596	70.8887	69.8267	71.7821	73.903
1399.7	1002.52		7417.46	7083.67		55.181	16.1953																				4.34227	5.903		9.92351	13.6397			3	56.4264	54.5798	57.0948	56.9195	71.1595	52.0408	54.5126	56.572	55.3578	68.1138	66.4449	64.205	62.2581	63.1108	69.0287
868.162	1181.17		7829.9	6899.22		34.9696	9.59887																				3.80937	4.596		13.2732	15.8367			4	54.2863	42.1475	50.6152	48.7429	63.1263	53.0539	38.728	49.2872	43.7385	65.6409	62.5715	58.5036	55.6021	55.7527	63.7914
	1044.6			6710.71		18.7992	15.2368																				5.14117	5.788		12.5207	12.8551			5	41.0056	35.5943	46.7057	43.6701	57.6137	55.3205	28.5393	45.9524	36.4367	61.9718	61.0102	54.906	50.3064	50.2386	59.9352
	1201.62			7170.46		28.7377	38.0219																				4.42846	6.666		13.0351	14.1827			6	44.0288	34.6441	44.6989	40.6735	53.8412	52.674	25.7967	43.4491	31.1446	56.8522	59.1579	52.3047	45.2484	47.526	58.3863
	632.956			6918.12		31.7712	31.8489																				3.282	4.342		12.2686	11.76			6.86667	38.1474	26.0559	42.589	37.969	51.3992	53.4365	23.9699	45.3871	28.4872	60.3891	57.2481	50.5323	42.8381	45.2917	56.9238
																											4.257			4.84261	11.6828		Recovery	11.8667	85.0436	67.3249	91.8293	84.9284	89.1294	76.7682	88.3656	86.0174	80.2065	89.9981	93.6897	97.4962	89.9015	97.6821	89.8834
																											5.247			13.2133				16.8667	84.4181	74.2488	97.8204	87.4197	95.9832	72.5235	81.9365	85.5753	90.3732	89.3991	87.1885	102.157	97.096	101.896	90.3813
																											5.187			11.3575
																											4.322
[truncated: 24 more columns]

## Sheet: Figure 5-figure supplement 1
Supplemental 8C. Exercise Adherence				Supplemental 8E. Percent centrally nucleated fibers
	GFP	KL		Control	Treadmill
Cohort 1	0.8125	0.8875		4.83502	11.2406
	0.1	0.8875		3.64987	3.65164
	1	0.25		1.71789	5.04808
	0.925	0.9625		1.07307	1.62214
	0.8875	0.8125		6.06061	9.16564
	0.1	0.5875		2.53894	15.7008
Cohort 2	0.4375	0.25		2.5593	5.54095
	0.83125	0.85			15.5725
	0.8875	0.68125			3.13647
	0.94375	0.8875			3.65197
	0.3625	0.925			4.32041
	0.98125	0.86875			5.86766
Excluded from other analyses				Excluded due to low adherence
