# Supplementary material for: The biphasic and age-dependent impact of klotho on hallmarks of aging and skeletal muscle function
Source: eLife. 2021 Apr 20;10:e61138. doi: 10.7554/eLife.61138 (PMC8118657; doi:10.7554/eLife.61138)
Supplement: Figure 6—source data 1. [file elife-61138-fig6-data1.xlsx]

## Sheet: Figure 6
OLD FEMALE MICE (21-24 MONTHS)
Figure 6D. TA as Percent of Body Weight			Figure 6E. Mean Fiber CSA (um^2)			Figure 6F. Percent of Type IIA/X Fibers			Figure 6G. Lipid Intensity (a.u./um^2)					Figure 6H. Maximum Specific Tetanic Force (mN/mm^2)			Figure 6I. Hang Impulse Fold Change
GFP	KL		GFP	KL		GFP	KL		GFP Inter	KL Inter	GFP Intra	KL Intra		GFP	KL		GFP	KL
0.132353	0.151852		2211.84	2133.75		39.0999	38.7493		34382.1	55900.3	36622.5	43635.5		16.3698	17.1135		0.94742	2.11931
0.106849	0.119632		2096.87	2194.47		31.6224	41.625		58254.8	29294.9	100482	42922.9		16.1318	20.7968		0.751604	1.72583
0.124294	0.121127		2385.73	1831.81		24.5183	25.7365		58990.8	45838.2	84640.5	66060.4		14.5612	22.2134		1.1641	1.32388
0.151515	0.132308		2059.05	2158.07		37.6022	41.6206		42780.7	15031.4	108397	22985.4		15.8789	13.7803		0.273421	1.20631
	0.146953			2074.48			27.4625			20598.5		48892.8		14.8915	17.3902		0.608733	0.977581
	0.133803			2693.2			30.0614			19075.5		38577.9		15.2957			1.05873	0.650072
														16.0933			0.273565
																	0.717499
																	0.505232
OLDEST-OLD FEMALE MICE (27-29 MONTHS)
Figure 6J. TA as Percent of Body Weight			Figure 6K. Mean Fiber CSA (um^2)			Figure 6L. Percent of Type IIA/X Fibers			Figure 6M. Lipid Intensity (a.u./um^2)					Figure 6N. Maximum Specific Tetanic Force (mN/mm^2)			Figure 6O. Hang Impulse Fold Change
GFP	KL		GFP	KL		GFP	KL		GFP Inter	KL Inter	GFP Intra	KL Intra		GFP	KL		GFP	KL
0.121324	0.12		1570.63	1889.63		31.3453	25.7511		81366.2	81526.9	88910.3	144513		17.3795	6.4805		0.433388	0.949273
0.141176	0.121212		2213.71	2320.53		22.5837	39.3922		61761.9	85294.8	108963	121410		14.5641	9.01464		0.422881	0.670184
0.119565	0.113402		2244.01	1782.31		43.4045	34.8967		22361.8	89915.5	36621.8	150129		14.3831	8.92555		0.560097	0.795207
0.131488	0.147679		2182.71	2141.69		39.4353	32.5451		66670.9	82704.1	123870	141947		7.13773	8.81011		0.356305	0.247093
0.126812	0.106667		2111.58	1999.48		38.4	24.1841							12.8291	15.7294		0.708631	1.5008
0.139785	0.124161		2143.99	1589.62		36.9138	27.9097							17.1172	15.0989		1.40758	1.27083
0.118033	0.13099													12.7225	14.8751			0.310984
0.140794	0.148438													12.3311				1.09332

## Sheet: Figure 6-figure supplement 1
F6-S1A Hang Impulse Fold Change from Baseline					F6-S1B Fiber Number					F6-S1C Denervation Normalized Gene Counts
					21-24		27-29			Old Musk		Old Runx1		Old Ncam1		Oldest-Old Musk		Oldest-Olde Runx1		Oldest-Old Ncam1
GFP	AAV-Kl Low Dose	AAV-Kl Mid Dose	AAV-Kl High Dose		GFP	KL	GFP	KL		21-24 GFP	21-24KL	21-24 GFP	21-24KL	21-24 GFP	21-24KL	27-29 GFP	27-29KL	27-29 GFP	27-29KL	27-29 GFP	27-29KL
0.608733	2.99725	1.57665	0.797101		1711	1871	1442	1631		525.867	1031.3	196.043	334.629	274.292	400.87	670.324	725.403	527.955	664.716	511.853	460.844
1.05873	1.51372	1.07308	1.7542		1695	1600	1045	1711		656.921	849.481	524.637	234.942	406.751	286.396	604.744	753.796	361.199	902.162	377.671	425.954
0.273565	2.53853	1.18063	0.268781		1505	1799	1592	1791		1065.35	634.824	337.593	541.496	409.539	307.204	797.042	1097.44	521.797	1576	437.842	722.952
0.717499	1.26063	1.11314	1.10668		1468	1629	2054	888		964.809	573.75	215.901	335.55	311.483	347.978	1040.58	616.31	619.839	272.653	537.945	297.268
0.505232						1533	1125	1195
						1141	2644	1684
