# Supplementary material for: The biphasic and age-dependent impact of klotho on hallmarks of aging and skeletal muscle function
Source: eLife. 2021 Apr 20;10:e61138. doi: 10.7554/eLife.61138 (PMC8118657; doi:10.7554/eLife.61138)
Supplement: Figure 7—source data 1. [file elife-61138-fig7-data1.xlsx]

## Sheet: Figure 7-figure supplement 1
Supp. 10A Circulating FGF23 (ng/mL)					Supp. 10B FGF23 TA Normalized Gene Count						Supp. 10C Klotho and FGF23 Interactors Normalized Gene Counts
21-24		27-29									FGF6					FGFR4					FGF22					DMP1
GFP	KL	GFP	KL		3-6 GFP	21-24 GFP	21-24 Kl	27-29 GFP	27-29 Kl		3-6 GFP	21-24 GFP	21-24 Kl	27-29 GFP	27-29 Kl	3-6 GFP	21-24 GFP	21-24 Kl	27-29 GFP	27-29 Kl	3-6 GFP	21-24 GFP	21-24 Kl	27-29 GFP	27-29 Kl	3-6 GFP	21-24 GFP	21-24 Kl	27-29 GFP	27-29 Kl
0.138136	0.10938	0.268844	0.377056		1.16209	0.841387	2.28416	1.69488	0		178.962	419.011	303.793	431.347	348.004	127.83	124.525	132.481	99.9978	164.046	10.4588	3.36555	6.85248	3.38976	4.7412	5.81044	1.68277	11.4208	5.93208	8.53416
0.283594	0.503007	0.272171	0.603254		1.18777	1.79978	3.88334	2.35309	5.58367		146.096	265.468	212.613	328.256	302.316	119.965	91.7889	79.6085	143.538	92.5294	4.75108	1.79978	5.82501	5.88272	3.19067	2.37554	4.49946	7.76668	7.05927	3.19067
0.207494	0.091155	0.26427	0.154846		0	4.15073	1.94433	0	0		149.956	202.002	286.789	369.827	370.768	159.953	121.755	110.827	117.962	120.802	12.7235	8.30146	3.88866	8.50178	4.64622	4.54411	4.15073	11.666	1.06272	9.29244
0.109369	0.273927	0.252954	0.118372		2.41049	0	0	1.50264	0		212.123	202.408	424.616	404.21	346.497	131.372	130.44	146.027	78.8886	128.753	9.64197	5.62243	4.1426	16.529	1.89343	7.23147	13.4938	2.0713	3.7566	8.52042
	0.101522	0.557907	0.200578
